# Supplementary material
Source: Springer Nature journal article supplement (https://www.springermedizin.de/resource/supplementary/12884_2012_559_MOESM1_ESM.pdf/9457782)

■  $\leq 1$  visit   ■ 2 visits   ■  $\geq 3$  visits

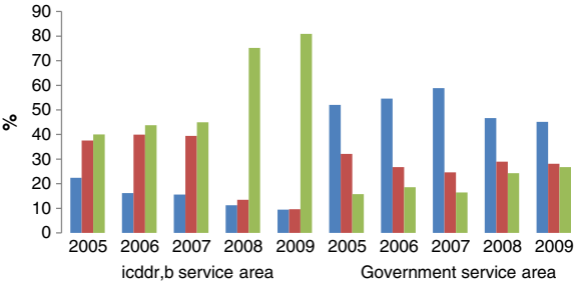

Supplement: MOESM1 [file 9457782]
